# Supplementary material
Source: Springer Nature journal article supplement (https://www.springermedizin.de/resource/supplementary/12979_2006_33_MOESM4_ESM.pdf/9603212)

**CD56<sup>bright/dim</sup>  
NK Cells (% of  
lymphocytes)**

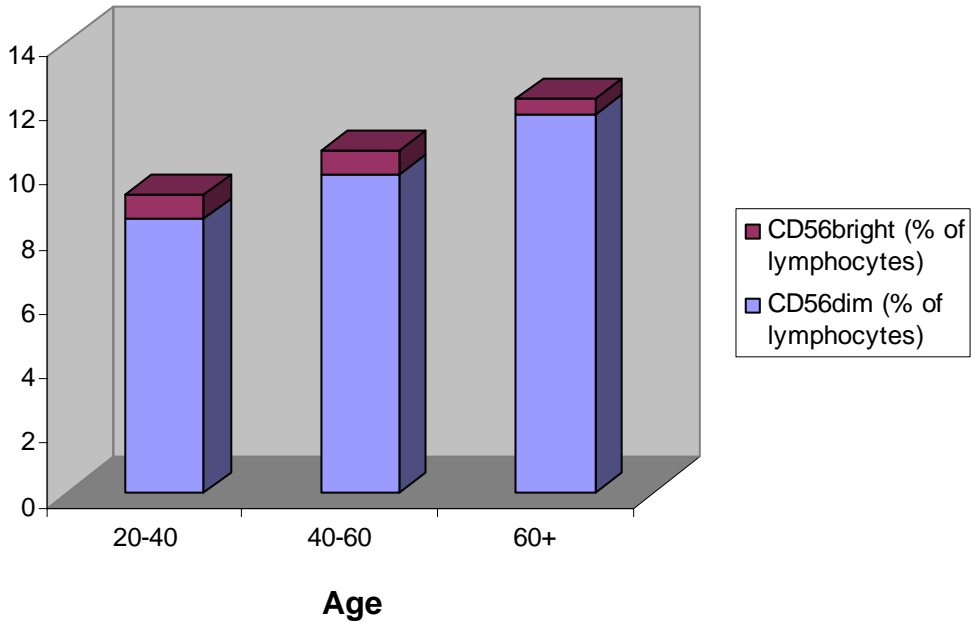

Supplement: MOESM4 [file 9603212]
